# Supplementary material for: The Effect of Solvent Vapor Annealing on Drug-Loaded Electrospun Polymer Fibers
Source: PubMed Central journal article supplement (PMC7076406; doi:10.3390/pharmaceutics12020139), 2020-02-06
Supplement: pharmaceutics-12-00139-s001.pdf [file pharmaceutics-12-00139-s001.pdf]

# Supplementary Materials: The Effect of Solvent Vapor Annealing on Drug-Loaded Electrospun Polymer Fibers

Yu-Jing Chiu, Ziwei Zhang, Karolina Dziemidowicz, Christos-Georgios Nikolettopoulos, Ukrit Angkawinitwong, Jiun-Tai Chen \* and Gareth R. Williams \*

**Table S1.** Details of the samples explored in aging experiments.

| Sample Name | Polymer conc. (% w/v) | Drug Loading conc. (% w/w) | Aging Time (d) |
|-------------|-----------------------|----------------------------|----------------|
| PCL         | 13                    | --                         | 0              |
| PCL-A4      | 13                    | --                         | 4              |
| PCL-A40     | 13                    | --                         | 40             |
| PCL-SPL     | 13                    | 15                         | 0              |
| PCL-SPL-A4  | 13                    | 15                         | 4              |
| PCL-SPL-A40 | 13                    | 15                         | 40             |

**Table S2.**  $T_g$ ,  $T_m$ , enthalpy of fusion, and percentage crystallinity for fresh samples and those aged for 4 and 40 days (denoted A4 and A40, respectively).

| Sample Name | Glass Transition Temperature ( $T_g$ ) (°C) | Melting Point ( $T_m$ ) (°C) | Enthalpy (J/g) | Crystallinity (%) |
|-------------|---------------------------------------------|------------------------------|----------------|-------------------|
| PCL         | -62.4                                       | 52.6±0.5                     | 69.5±1.4       | 49.8±0.9          |
| PCL-A4      | -63.9                                       | 53.6±0.6                     | 70.5±5.9       | 50.5±4.2          |
| PCL-A40     | -65.2                                       | 55.6±0.1                     | 73.9±3.1       | 53.0±2.2          |
| PCL-SPL     | -70.8                                       | 47.4±0.3                     | 59.7±2.9       | 42.8±2.1          |
| PCL-SPL-A4  | -68.5                                       | 49.6±0.8                     | 61.3±3.8       | 43.9±2.7          |
| PCL-SPL-A40 | -70.1                                       | 54.5±0.3                     | 65.9±2.9       | 47.2±2.1          |

**Table S3.** Table of the  $T_m$ , fusion enthalpy, and percentage crystallinity for the aged and annealed fibers.

| Sample Name | Melting Point<br>( $T_m$ ) (°C) | Enthalpy<br>(J/g) | Crystallinity<br>(%) |
|-------------|---------------------------------|-------------------|----------------------|
| PCL-48      | 57.25                           | 81.50             | 58.42                |
| PCL-A4-48   | 55.41                           | 82.73             | 59.30                |
| PCL-A30-48  | 55.70                           | 72.79             | 55.16                |

**Table S4.** Table of the  $T_m$ , fusion enthalpy, and percentage crystallinity for PCL and SPL-loaded PCL fibers after different annealing times.

| Sample Name | Melting Point<br>( $T_m$ ) (°C) | Enthalpy<br>(J/g) | Crystallinity<br>(%) |
|-------------|---------------------------------|-------------------|----------------------|
| PCL-0       | 55.1                            | 73.7              | 52.8                 |
| PCL-6       | 60.0                            | 93.5              | 66.9                 |
| PCL-48      | 60.5                            | 90.2              | 64.7                 |
| PCL-72      | 60.6                            | 96.7              | 69.3                 |
| PCL-SPL-0   | 53.6                            | 66.2              | 47.5                 |
| PCL-SPL-6   | 57.6                            | 85.7              | 61.4                 |
| PCL-SPL-48  | 58.2                            | 98.6              | 70.7                 |
| PCL-SPL-72  | 57.9                            | 96.5              | 69.2                 |

**Table S5.** The results of fitting the Ritger-Peppas model to SPL release from the fiber formulations.

| Value                  | PCL-SPL-0 | PCL-SPL-6 | PCL-SPL-48 | PCL-SPL-72 |
|------------------------|-----------|-----------|------------|------------|
| $k$ (h <sup>-1</sup> ) | 0.357     | 0.216     | 0.243      | 0.354      |
| $n$                    | 0.13      | 0.19      | 0.15       | 0.077      |
| $R^2$                  | 0.59      | 0.95      | 0.91       | 0.93       |

**Table S6.** Atomic ratios for the annealed SPL-loaded fibers, as determined by XPS.

| Sample Name | C <sub>1s</sub> (%) | O <sub>1s</sub> (%) | S <sub>2p</sub> (%) |
|-------------|---------------------|---------------------|---------------------|
| PCL-SPL-0   | 81.4±1.8            | 17.6±1.2            | 0.9±0.7             |
| PCL-SPL-6   | 82.6±1.2            | 16.7±1.1            | 0.6±0.8             |
| PCL-SPL-48  | 80.1±1.5            | 19.5±2.2            | 0.4±0.8             |
| PCL-SPL-72  | 80.6±0.9            | 19.4±0.9            | 0.0±0.0             |

**Table S7.**  $T_m$ , fusion enthalpy, and percentage crystallinity of annealed fibers subjected to aging at room temperature for two months.

| Sample Name | Melting Point ( $T_m$ ) (°C) | Enthalpy (J/g) | Crystallinity (%) |
|-------------|------------------------------|----------------|-------------------|
| PCL-SPL-0   | 54.8                         | 74.6           | 53.5              |
| PCL-SPL-6   | 58.7                         | 84.3           | 60.4              |
| PCL-SPL-48  | 60.7                         | 96.8           | 69.4              |
| PCL-SPL-72  | 60.1                         | 99.4           | 71.3              |

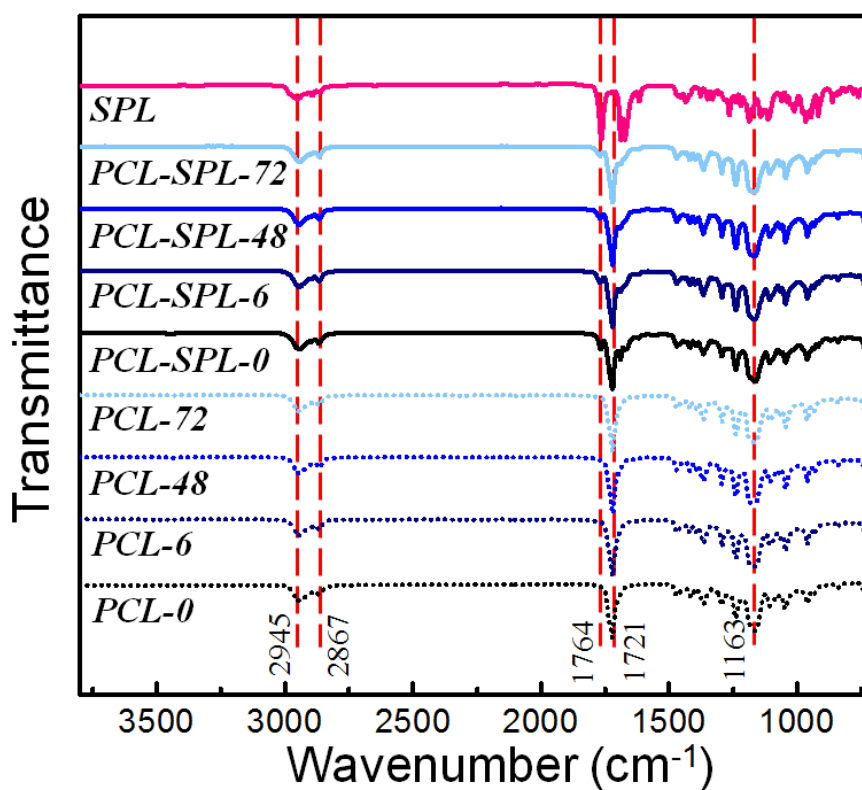

**Figure S1.** FT-IR spectra of the annealed fibers.

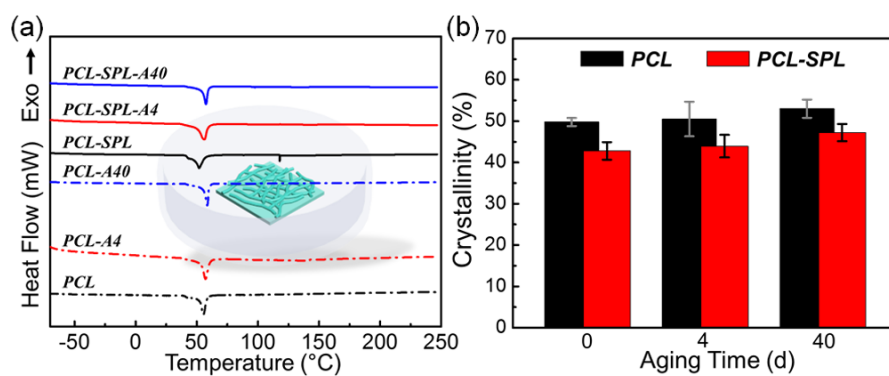

**Figure S2.** (a) DSC curves (exo up) and (b) PCL crystallinity of samples for fresh samples and those aged for 4 and 40 days (denoted A4 and A40, respectively).



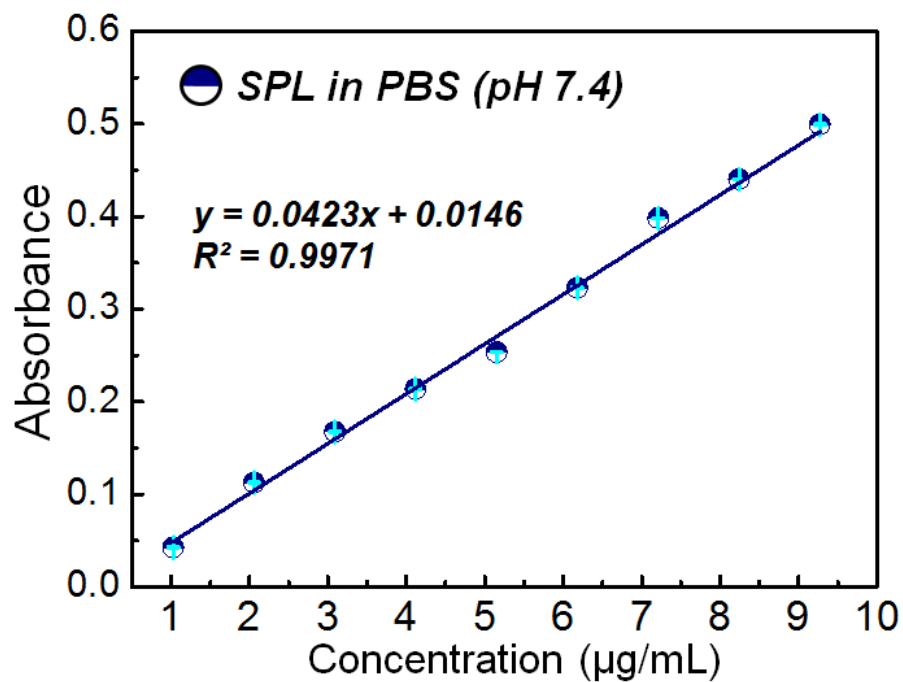

Figure S5. Standard curve of SPL in PBS at pH 7.4.

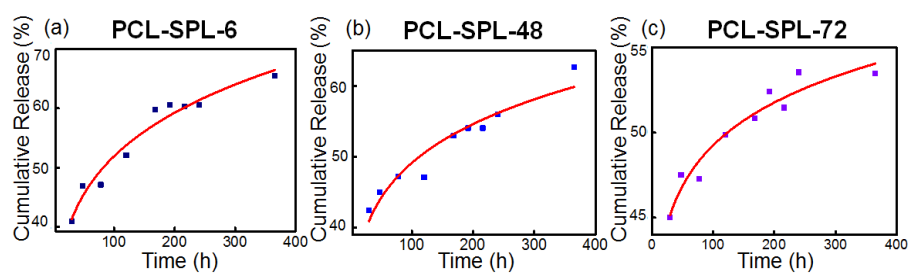

Figure S6. Fits of the Ritger-Peppas models to the release data for (a) PCL-SPL-6, (b) PCL-SPL-48, and (c) PCL-SPL-72 fibers from 0 to 360 h.

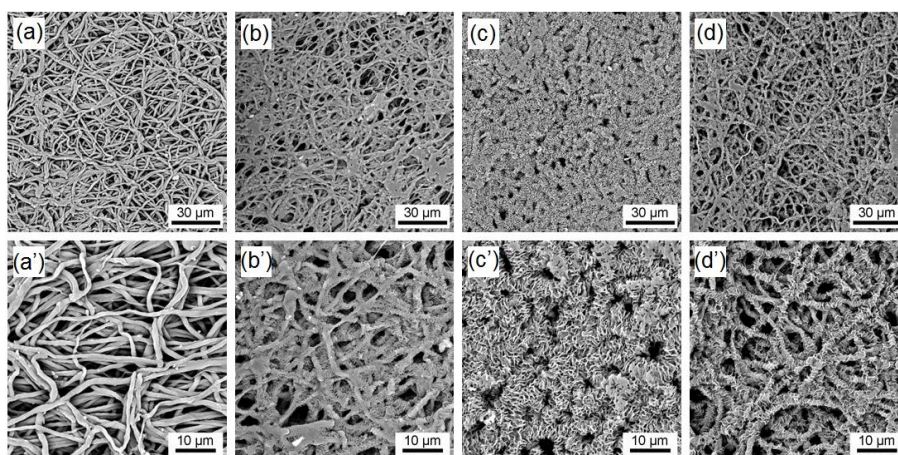

Figure S7. SEM images with (a-d) lower and (a'-d') higher magnifications of the SPL-loaded PCL fibers after 15 days' immersion in PBS. Images are shown for (a,a') PCL-SPL-0, (b,b') PCL-SPL-6, (c,c') PCL-SPL-48, and (d,d') PCL-SPL-72.

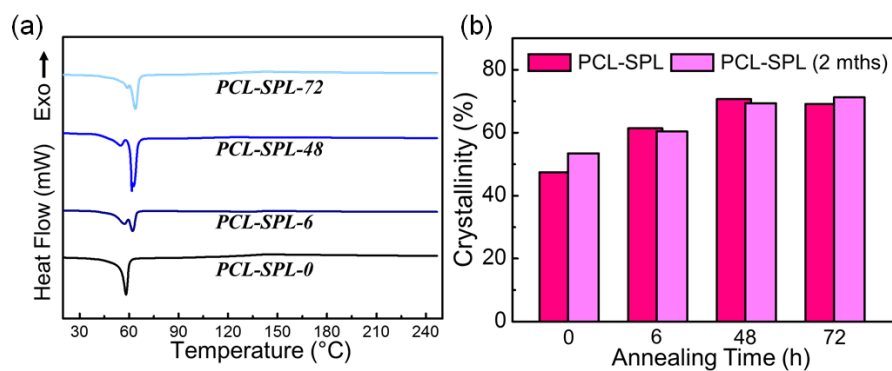

**Figure S8.** The results of stability studies after storage of the annealed fibers at ambient temperature for two months. (a) DSC curves (exo up). (b) Plot of the percentage of PCL crystallinity against the annealing time for annealed SPL-loaded fibers, both immediately after annealing and after two months' storage.
